# Supplementary material for: Description and evaluation of the process-based forest model 4C v2.2 at four European forest sites
Source: Copernicus journal article supplement (doi:10.5194/gmd-13-5311-2020), 2020-11-05
Supplement: Supplementary file 1 [file gmd-13-5311-2020-supplement.pdf]

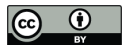

*Supplement of*

## **Description and evaluation of the process-based forest model 4C v2.2 at four European forest sites**

**Petra Lasch-Born et al.**

*Correspondence to:* Petra Lasch-Born ([lasch@pik-potsdam.de](mailto:lasch@pik-potsdam.de)), and Felicitas Suckow ([suckow@pik-potsdam.de](mailto:suckow@pik-potsdam.de))

The copyright of individual parts of the supplement might differ from the CC BY 4.0 License.

## Contents

|                                                                                |           |
|--------------------------------------------------------------------------------|-----------|
| <b>S1 Overview about 4C Applications .....</b>                                 | <b>2</b>  |
| <b>S2 Forest growth.....</b>                                                   | <b>12</b> |
| <b>S3 Fluxes .....</b>                                                         | <b>14</b> |
| <b>S3.1 Sorø .....</b>                                                         | <b>14</b> |
| S3.1.1 Graphical analysis daily data Sorø.....                                 | 14        |
| S3.1.2 Graphical analysis monthly data Sorø .....                              | 16        |
| <b>S3.2 Hyytiälä .....</b>                                                     | <b>18</b> |
| S3.2.1 Graphical analysis daily data Hyytiälä .....                            | 18        |
| S3.2.2 Graphical analysis monthly data Hyytiälä .....                          | 20        |
| S3.2.3 Graphical analysis of soil temperature and water content Hyytiälä ..... | 22        |
| <b>S3.3 Analysis of deviations of actual evapotranspiration .....</b>          | <b>23</b> |
| <b>S4 Soil temperature and water content Hyytiälä .....</b>                    | <b>24</b> |
| <b>S5 Additional data .....</b>                                                | <b>26</b> |
| <b>References .....</b>                                                        | <b>31</b> |

## S1 OVERVIEW ABOUT 4C APPLICATIONS

**Table S1 Applications of the model 4C**

| Publication               | Region                                                                              | Analysis                                                                                                                                                                                                 | Results                                                                                                                                                                                                                                                                                                      |
|---------------------------|-------------------------------------------------------------------------------------|----------------------------------------------------------------------------------------------------------------------------------------------------------------------------------------------------------|--------------------------------------------------------------------------------------------------------------------------------------------------------------------------------------------------------------------------------------------------------------------------------------------------------------|
| Lasch et al., 2002        | Pine stand in Brandenburg, several 24 pine, spruce, oak and beech stands in Germany | Sensitivity study regarding climate and growth analysis under climate change                                                                                                                             | Water limitation effects for forest growth in German temperate forests are important and an increasing direct effect of rising temperatures at higher elevation sites is shown.                                                                                                                              |
| Gerstengarbe et al., 2003 | Brandenburg/ Germany                                                                | Effects of climate change on carbon budget and water balance of forests in Brandenburg using 461 forest stands and one climate scenario                                                                  | The effects of climate change were stronger for the water balance than for the carbon budget due to the assumed climate scenario.                                                                                                                                                                            |
| Badeck et al., 2005       | Management unit in Brandenburg/ Germany                                             | Application of adaptive forest management strategies and climate scenarios to a management unit in Brandenburg                                                                                           | <ul style="list-style-type: none"> <li>- The effect of choosing alternative treatment programs on harvested wood volumes can be smaller or higher than the climate change impact.</li> <li>- Both the alternative treatment programs and climate change increased the volume of harvested timber.</li> </ul> |
| Fürstenau et al., 2007    | Management unit in Brandenburg/ Germany                                             | Evaluation of alternative management strategies at the forest management unit level under current climate and under transient climate change conditions over a planning period of 100 years. Application | <ul style="list-style-type: none"> <li>- Climate change increases carbon sequestration and income from timber production due to increased stand productivity.</li> <li>- Forest manager in public-owned forests or a private forest owner</li> </ul>                                                         |

| Publication           | Region                                                               | Analysis                                                                                                                                    | Results                                                                                                                                                                                                                                                                                                                                                                                                                           |
|-----------------------|----------------------------------------------------------------------|---------------------------------------------------------------------------------------------------------------------------------------------|-----------------------------------------------------------------------------------------------------------------------------------------------------------------------------------------------------------------------------------------------------------------------------------------------------------------------------------------------------------------------------------------------------------------------------------|
|                       |                                                                      | of a multi-criteria analysis method                                                                                                         | would prefer a management strategy with an intermediate thinning intensity and a high share of pine stands                                                                                                                                                                                                                                                                                                                        |
| Lasch et al., 2007    | 3 Level II ICP Forest plots in Brandenburg, Lower Saxony and Bavaria | Application of climate scenarios with temperature increase and varying precipitation changes to analyse carbon budget of the forest stands. | Model simulated an increase in carbon stock of stem biomass, deadwood and soil.                                                                                                                                                                                                                                                                                                                                                   |
| Meiwes et al., 2007   | 21 Level II plots in Bavaria, Brandenburg and Lower Saxony Germany   | Modeling of the carbon budgets                                                                                                              | Models are suitable instruments for the analysis of the observation data from the monitoring plots. The combination of monitoring and modelling allows the evaluation of effects of climate change and forest management.                                                                                                                                                                                                         |
| Seidl et al., 2008    | Forest management unit in Carinthia, southern Austria                | Application of different management strategies under current climate and transient climate change and comparison with the model PICUS       | <ul style="list-style-type: none"> <li>– A transition to continuous cover forestry increased C storage in all climate scenarios compared to the approximately balanced C budget under the age class system.</li> <li>– With regard to climate change impacts both models agreed on distinct effects on productivity but lower sensitivity of C stocks due to compensation from respiration and adaptive harvest levels</li> </ul> |
| Wechsung et al., 2009 | Agricultural land in the 5 Federal states of East Germany            | Model based yield estimation of aspen short rotation coppice SRC under climate                                                              | Yields of fast growing aspen in SRC are expected to increase under the presumed changes of climate also on sandy soils                                                                                                                                                                                                                                                                                                            |

| Publication         | Region                                                    | Analysis                                                                                                                                                                                                                                                   | Results                                                                                                                                                                                                                                                                           |
|---------------------|-----------------------------------------------------------|------------------------------------------------------------------------------------------------------------------------------------------------------------------------------------------------------------------------------------------------------------|-----------------------------------------------------------------------------------------------------------------------------------------------------------------------------------------------------------------------------------------------------------------------------------|
|                     |                                                           | change                                                                                                                                                                                                                                                     | with low water holding capacity even when neglecting the beneficial effect of higher CO <sub>2</sub> .                                                                                                                                                                            |
| Kint et al., 2009   | Galgenberg forest in the Netherlands                      | Investigation how conversion management of a Scots pine <i>Pinus sylvestris</i> L. stand towards a mixed oak-birch stand would affect stand structural development and hence biodiversity and productivity in the long term.                               | The optimal conversion regime – in which both stand productivity and biodiversity objectives can be combined – implies thinning from above, pine tree retention, and cutting cycles of 6 years.                                                                                   |
| Kollas et al., 2009 | Agricultural land in Germany                              | Exploration the actual and future energy potential of short-rotation cop scenarios.                                                                                                                                                                        | <ul style="list-style-type: none"> <li>– If 4 m ha were used as SRC, between 415 and 522 PJ a-1 of primary energy could be produced in the scenario periods 2041-2060.</li> <li>– SRC can deliver a substantial contribution to the primary energy production in 2060.</li> </ul> |
| Lasch et al., 2009  | Mixed Scots pine-oak stands in Brandenburg Germany        | Analysis of carbon and water budget with various management strategies and under climate change; comparison with the model BWINPro                                                                                                                         | 4C allows the analysis of various ecosystem functions and the evaluation of management strategies regarding these functions.                                                                                                                                                      |
| Lasch et al., 2010  | Agricultural land in the 5 Federal states of East Germany | Estimation of the potential woody biomass yield of SRC plantations with aspen on suitable land in Eastern Germany under climate change and evaluation how aspen SRC plantation affects groundwater recharge and the impacts of land use change on the soil | Aspen SRC plantations are a suitable contribution to regional CO <sub>2</sub> mitigation and carbon sequestration under possible change of climate, but that negative impacts on the regional water budget are possible.                                                          |

| Publication            | Region                                                            | Analysis                                                                                                                                                        | Results                                                                                                                                                                                                                                                                                                                      |
|------------------------|-------------------------------------------------------------------|-----------------------------------------------------------------------------------------------------------------------------------------------------------------|------------------------------------------------------------------------------------------------------------------------------------------------------------------------------------------------------------------------------------------------------------------------------------------------------------------------------|
|                        |                                                                   | properties.                                                                                                                                                     |                                                                                                                                                                                                                                                                                                                              |
| Reyer et al., 2010     | Mixed Douglas fir- beech stands in Germany and in the Netherlands | Climate change effects on the inter-specific competition in a managed Douglas-fir/beech mixed forest.                                                           | Simulated climate change does not substantially alter the interaction of the two species. The concept of complementary water use highlights the importance of mixed forest for climate change adaptation.                                                                                                                    |
| Gutsch et al., 2011    | Mixed oak-pine stand in Brandenburg/ Germany                      | Analysis of different management scenarios under climate change                                                                                                 | <ul style="list-style-type: none"> <li>– The analysis of variance in the growth related model outputs showed an increase of climate related uncertainty of forest growth with increasing climate warming.</li> <li>– The increase of climate induced uncertainty is much higher from 2 to 3 K than from 0 to 2 K.</li> </ul> |
| Borys et al., 2013     | Four beech forests of a management unit in Thuringia              | Analysis of carbon budget of the long-term experimental stands using a wood product model                                                                       | <ul style="list-style-type: none"> <li>– The impact of management on the carbon budgets is more determining than the impact of the selected climate scenarios.</li> <li>– The unmanaged experimental site under the 3K-scenario stores the highest amount of total carbon.</li> </ul>                                        |
| van Oijen et al., 2013 | Twelve sites, from Austria, Belgium, Estonia and Finland.         | Evaluation how Bayesian calibration BC, Bayesian model comparison BMC and Bayesian model averaging BMA can help to assess the uncertainty of model predictions. | <ul style="list-style-type: none"> <li>– BC reduced uncertainties strongly in all but the most complex model.</li> <li>– BMC using NFI- and PSP-data identified the 4C model, which is of moderate complexity but</li> </ul>                                                                                                 |

| Publication             | Region                                                                                            | Analysis                                                                                                                                                        | Results                                                                                                                                                                                                                                                                                                                                                                 |
|-------------------------|---------------------------------------------------------------------------------------------------|-----------------------------------------------------------------------------------------------------------------------------------------------------------------|-------------------------------------------------------------------------------------------------------------------------------------------------------------------------------------------------------------------------------------------------------------------------------------------------------------------------------------------------------------------------|
|                         |                                                                                                   |                                                                                                                                                                 | mechanistic, as the most plausible forest model after calibration.                                                                                                                                                                                                                                                                                                      |
| Stojanović et al., 2014 | Nine European beech forest sites in Serbia                                                        | Integration of stakeholder preferences, experts' opinion and forest growth modelling for climate and management scenario assessments                            | <ul style="list-style-type: none"> <li>– Forest management together with stakeholder preferences will play much bigger role in providing of better support for ecosystem service in comparison to climate conditions</li> <li>– frequent felling operations provide better result than less frequent operations for the same amount of harvested wood.</li> </ul>       |
| Reyer et al., 2014      | 132 typical forest sites of important European tree species in ten environmental zones in Europe. | Projection of forest productivity changes under different climate change scenarios at a large number of sites in Europe with a stand-scale process-based model. | <ul style="list-style-type: none"> <li>– Future forest productivity will be affected by climate change and these effects depend strongly on the climate scenario used and the persistence of CO<sub>2</sub> effects. Productivity increases in Northern Europe, increases or decreases in Central Europe, and decreases in Southern Europe.</li> </ul>                  |
| Borys et al., 2015      | Management unit in Thuringia Buchfahrt                                                            | Economic analysis of the beech stands of the considered management unit                                                                                         | <ul style="list-style-type: none"> <li>– The study shows that from an economic point of view it is often more appropriate to abandon the usual thinning management of beech stands with heavy thinning from above in favour of management fostering stronger carbon storage.</li> <li>– The increase in carbon storage in the forest by medium thinning from</li> </ul> |

| Publication            | Region                                                                                                          | Analysis                                                                                                                           | Results                                                                                                                                                                                                                                                                                                                                                                                             |
|------------------------|-----------------------------------------------------------------------------------------------------------------|------------------------------------------------------------------------------------------------------------------------------------|-----------------------------------------------------------------------------------------------------------------------------------------------------------------------------------------------------------------------------------------------------------------------------------------------------------------------------------------------------------------------------------------------------|
|                        |                                                                                                                 |                                                                                                                                    | below and no management was, however, associated with additional costs or lower revenues of 112 € and 123 € per additional ton of carbon stored respectively.                                                                                                                                                                                                                                       |
| Gutsch et al., 2015a   | Agriculture and Forestry in Germany                                                                             | Assessment of the uncertainty caused by climate change effects in the potential supply of biomass available for energy production. | In five federal states the climate scenarios lead to decreasing yields of energy maize and winter wheat. Impacts of climate scenarios on forest yields are mainly positive and show both positive and negative effects on yields of SRC.                                                                                                                                                            |
| Gutsch et al., 2015b   | Two mono-species Scots pine stands and two mixed Scots pine-oak stands in the lowlands of northeastern Germany. | Analysis of two water uptake approaches an empirical and a more process-based one in Scots pine and Scots pine-Sessile oak stands. | Accurate projections of future forest productivity depend largely on the realistic representation of root water uptake in forest model simulations. Three different measured parameters transpiration, soil water content, tree rings did not allow a superior approach to each other.                                                                                                              |
| Schelhaas et al., 2015 | Europe                                                                                                          | The data from Reyer et al. 2014 was used to scale the future productivity changes in EFISCEN.                                      | The European forest system is very inert and it takes a long time to influence the species distribution by replacing species after final felling. By 2070, on average about 36 % of the area expected to have decreased species suitability will have changed species following business as usual management. Alternative management, consisting of shorter rotations for those species and species |



| Publication             | Region                                           | Analysis                                                                                                                                                                                                                                                                                                      | Results                                                                                                                                                                                                                                                                                                                                       |
|-------------------------|--------------------------------------------------|---------------------------------------------------------------------------------------------------------------------------------------------------------------------------------------------------------------------------------------------------------------------------------------------------------------|-----------------------------------------------------------------------------------------------------------------------------------------------------------------------------------------------------------------------------------------------------------------------------------------------------------------------------------------------|
|                         |                                                  |                                                                                                                                                                                                                                                                                                               | planting based on expected trends, will have increased this species transition to 40 %.                                                                                                                                                                                                                                                       |
| Lasch-Born et al., 2015 | Forested area in Germany                         | How do changes in net primary production and timber production interact with changes in the water budget under climate change? What are the possible risks of fire danger or pest outbreaks?                                                                                                                  | The dryer water-limited low elevated regions reaching from southwestern to northeastern Germany will benefit less from the assumed climate change than regions in the Northwest and forest sites at higher altitudes, which are mainly temperature limited.                                                                                   |
| Borys et al., 2016      | Forest management unit in Thuringia<br>Buchfahrt | Assessment how much carbon C is currently stored in a forest district and how the carbon stocks will develop up to the year 2099 with a changing climate and under various management regimes including no management, with different assumptions about carbon dioxide CO <sub>2</sub> fertilization effects. | Climate change affects carbon sequestration. The no management strategy sequestered the highest amount of carbon which was greater than the management regimes. In the model, the possible fertilization effect of CO <sub>2</sub> is an important factor. However, forest management remains the determining factor in this forest district. |
| Gutsch et al., 2016     | Forest area Germany                              | This study aims to derive simple models from 4C simulations with low data requirements which allow calculation of NPP and analysis of climate impacts using many climate scenarios at a large amount of sites.                                                                                                | The fitted regression functions showed a reasonable fit to measured NPP datasets. Temperature increase of up to 3 K leads to positive effects on NPP. In water-limited regions, this positive effect is dependent on the length of drought periods.                                                                                           |
| Reyer et al., 2016      | Two NFI sites each from Austria,                 | This paper aims to integrate parameter                                                                                                                                                                                                                                                                        | If a key objective in climate change                                                                                                                                                                                                                                                                                                          |

| Publication           | Region                                                               | Analysis                                                                                                                                                                                                                                                                                                                        | Results                                                                                                                                                                                                                                                                                                                                                                                                     |
|-----------------------|----------------------------------------------------------------------|---------------------------------------------------------------------------------------------------------------------------------------------------------------------------------------------------------------------------------------------------------------------------------------------------------------------------------|-------------------------------------------------------------------------------------------------------------------------------------------------------------------------------------------------------------------------------------------------------------------------------------------------------------------------------------------------------------------------------------------------------------|
|                       | Belgium, Estonia and Finland                                         | uncertainty into simulations of climate change impacts on forest net primary productivity NPP. Application of either prior uncalibrated or posterior calibrated using Bayesian calibration parameter variations to express parameter uncertainty.                                                                               | impact research is to quantify uncertainty, parameter uncertainty as a major factor driving the degree of uncertainty of projections should be included.                                                                                                                                                                                                                                                    |
| Suckow et al., 2016   | Scots pine stand Zotino Siberia, Russia                              | Analysis of impacts of climate change on a pine forest stand in Central Siberia to assess benefits and risks for such forests in the future.                                                                                                                                                                                    | The analysis confirms increasing productivity of the boreal pine stand but also highlights increasing drought stress and risks from abiotic disturbances which could cancel out productivity gains.                                                                                                                                                                                                         |
| Horemans et al., 2017 | FLUXNET sites: Soroe Denmark, Vielsalm Belgium and Collelongo Italy. | The performance of two global dynamic vegetation models, i.e. CARAIB and ISBACC, and one stand-scale forest model, i.e. 4C, was compared to long-term observed net ecosystem carbon exchange NEE time series from eddy covariance monitoring stations at three old-grown European beech <i>Fagus sylvatica</i> L. forest stands | <ul style="list-style-type: none"> <li>– The most important errors for all three models occurred at the edges of the observed NEE distribution and the model errors were correlated with environmental variables on a daily scale</li> <li>– Models should be evaluated across multiple sites, preferably using multiple evaluation methods, to identify processes that request reconsideration.</li> </ul> |
| Gutsch et al., 2018   | Germany's forests, NFI data BWI <sup>3</sup>                         | Quantification of the effects of two alternative management scenarios and climate impacts on forest variables indicative of ecosystem services related to                                                                                                                                                                       | <ul style="list-style-type: none"> <li>– Northeastern and western forest regions are more suitable to provide timber while minimizing the negative impacts on remaining ecosystem services whereas southern and central</li> </ul>                                                                                                                                                                          |

| Publication             | Region                                 | Analysis                                                                                                                                                                                                                                                              | Results                                                                                                                                                                                                                                                                                                                                                                        |
|-------------------------|----------------------------------------|-----------------------------------------------------------------------------------------------------------------------------------------------------------------------------------------------------------------------------------------------------------------------|--------------------------------------------------------------------------------------------------------------------------------------------------------------------------------------------------------------------------------------------------------------------------------------------------------------------------------------------------------------------------------|
|                         |                                        | timber, habitat, water, and carbon.                                                                                                                                                                                                                                   | <p>forest regions are more suitable to fulfil ‘habitat’ and ‘carbon’ services.</p> <ul style="list-style-type: none"> <li>– The results provide the base for future forest management optimizations at the regional scale in order to maximize ecosystem services and forest ecosystem sustainability at the national scale.</li> </ul>                                        |
| Kollas et al., 2018     | Scots pine stand in Berlin Germany     | Estimation of mistletoe-induced losses in timber yield applying the process-based forest growth model 4C.                                                                                                                                                             | Simulations showed that the amended forest growth model 4C depicts well the BAI growth pattern during >100 years and also quantifies well the mistletoe-induced growth reductions in Scots pine stands.                                                                                                                                                                        |
| Yousefpour et al., 2018 | Forest stands in 18 European countries | Simulation of European commercial forests’ growth conditions and coupled it with an optimization algorithm to simulate the implementation of Climate Smart Forestry for 18 European countries encompassing 68.3 million ha of forest 42.4% of total EU-28 forest area | A European Climate Smart Forestry CSF policy could sequester 7.3–11.1 billion tons of carbon, projected to be worth 103 to 141 billion euros in the 21st century. An efficient CSF policy would allocate carbon sequestration to European countries with a lower wood price, lower labour costs, high harvest costs, or a mixture thereof to increase its economic efficiency. |
| Lasch-Born et al., 2018 | Germany’s forests                      | Ongoing climate change affects growth and increases biotic and abiotic threats to Germany’s forests. How do these risks develop through the mid-century under a                                                                                                       | All indicators showed higher risks for the scenario time period compared to the recent time period, except the late frost risk indicators, if averaged over all                                                                                                                                                                                                                |

| Publication          | Region                            | Analysis                                                                                                                                                        | Results                                                                                                                                                                                                                                                                                                                                                                                                                                                          |
|----------------------|-----------------------------------|-----------------------------------------------------------------------------------------------------------------------------------------------------------------|------------------------------------------------------------------------------------------------------------------------------------------------------------------------------------------------------------------------------------------------------------------------------------------------------------------------------------------------------------------------------------------------------------------------------------------------------------------|
|                      |                                   | variety of climate change scenarios using 4C?                                                                                                                   | climate scenarios. The late frost risk for beech and oaks decreased for the main forest sites.                                                                                                                                                                                                                                                                                                                                                                   |
| Bugmann et al., 2019 | Scots pine stand Peitz Germany 4C | Evaluation 15 dynamic vegetation models DVMs regarding their sensitivity to different formulations of tree mortality under different degrees of climate change. | 1 Mortality is one of the most uncertain processes when it comes to assessing forest response to climate change, and 2 more data and a better process understanding of tree mortality are needed to improve the robustness of simulated future forest dynamics. Our study highlights that comparing several alternative mortality formulations in DVMs provides valuable insights into the effects of process uncertainties on simulated future forest dynamics. |

## S2 FOREST GROWTH

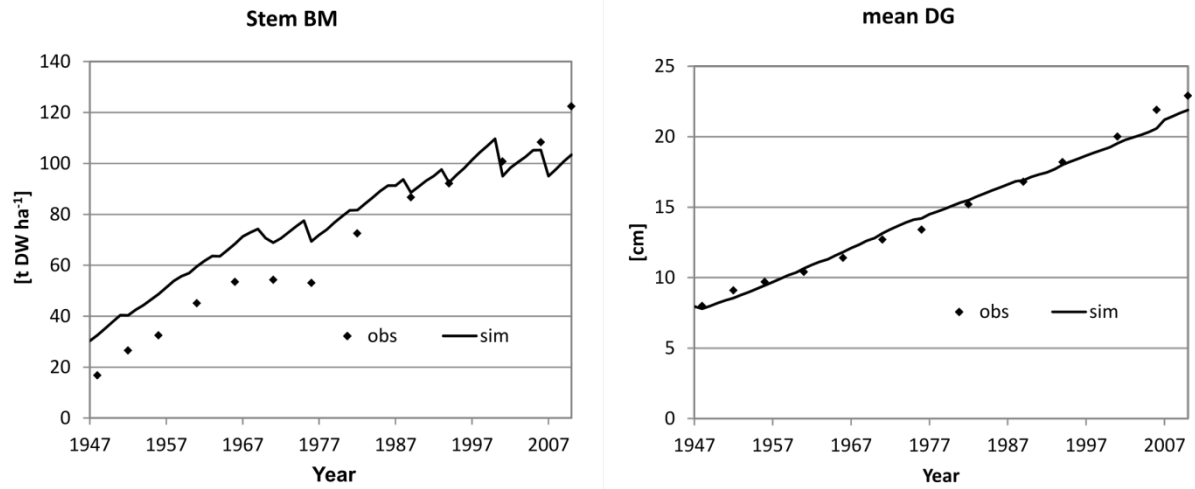

**Figure S1 Simulated sim and observed obs DG and stem biomass BM for Peitz. The plots show the time series.**

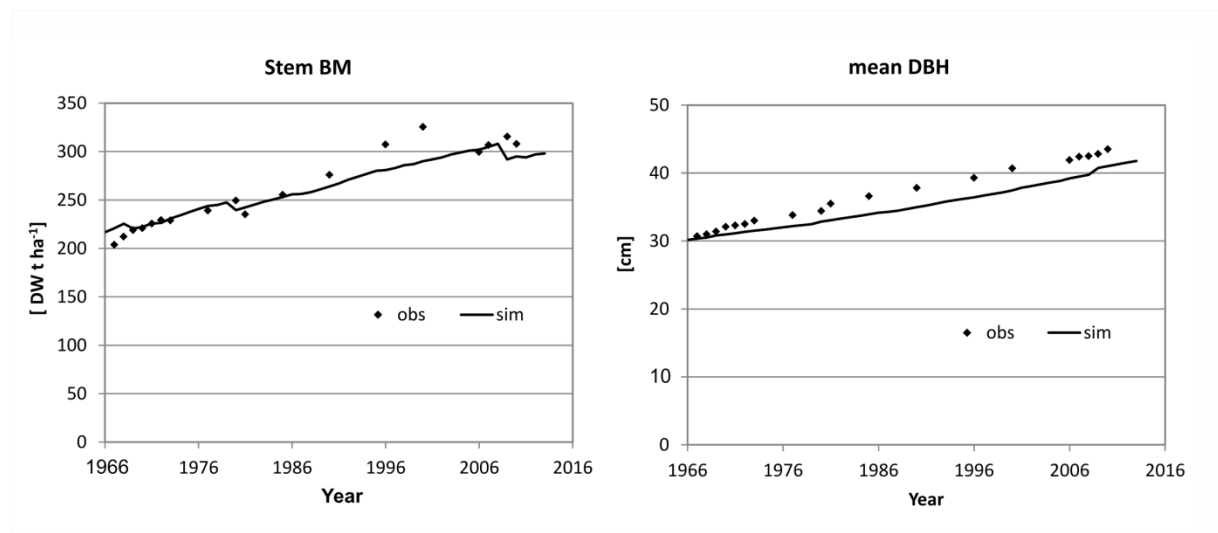

**Figure S2 Simulated sim and observed obs DBH and stem biomass BM for Solling. The plots show the time series.**

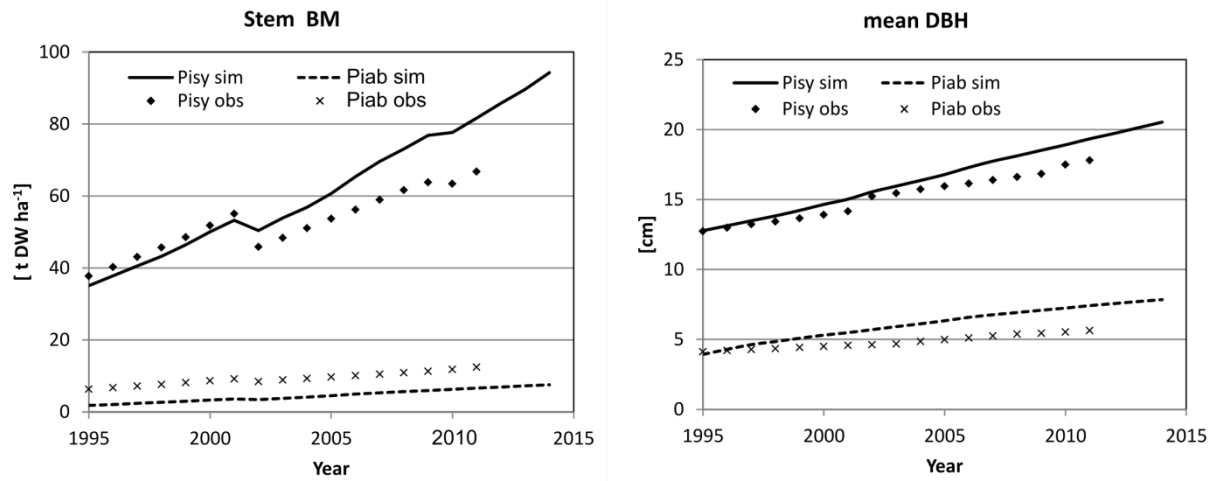

**Figure S3 Simulated sim and observed obs DBH and stem biomass BM for Hyytiälä Pisy – pine, Piab – spruce. The plots show the time series.**

## S3 FLUXES

### S3.1 Sorø

#### S3.1.1 Graphical analysis daily data Sorø

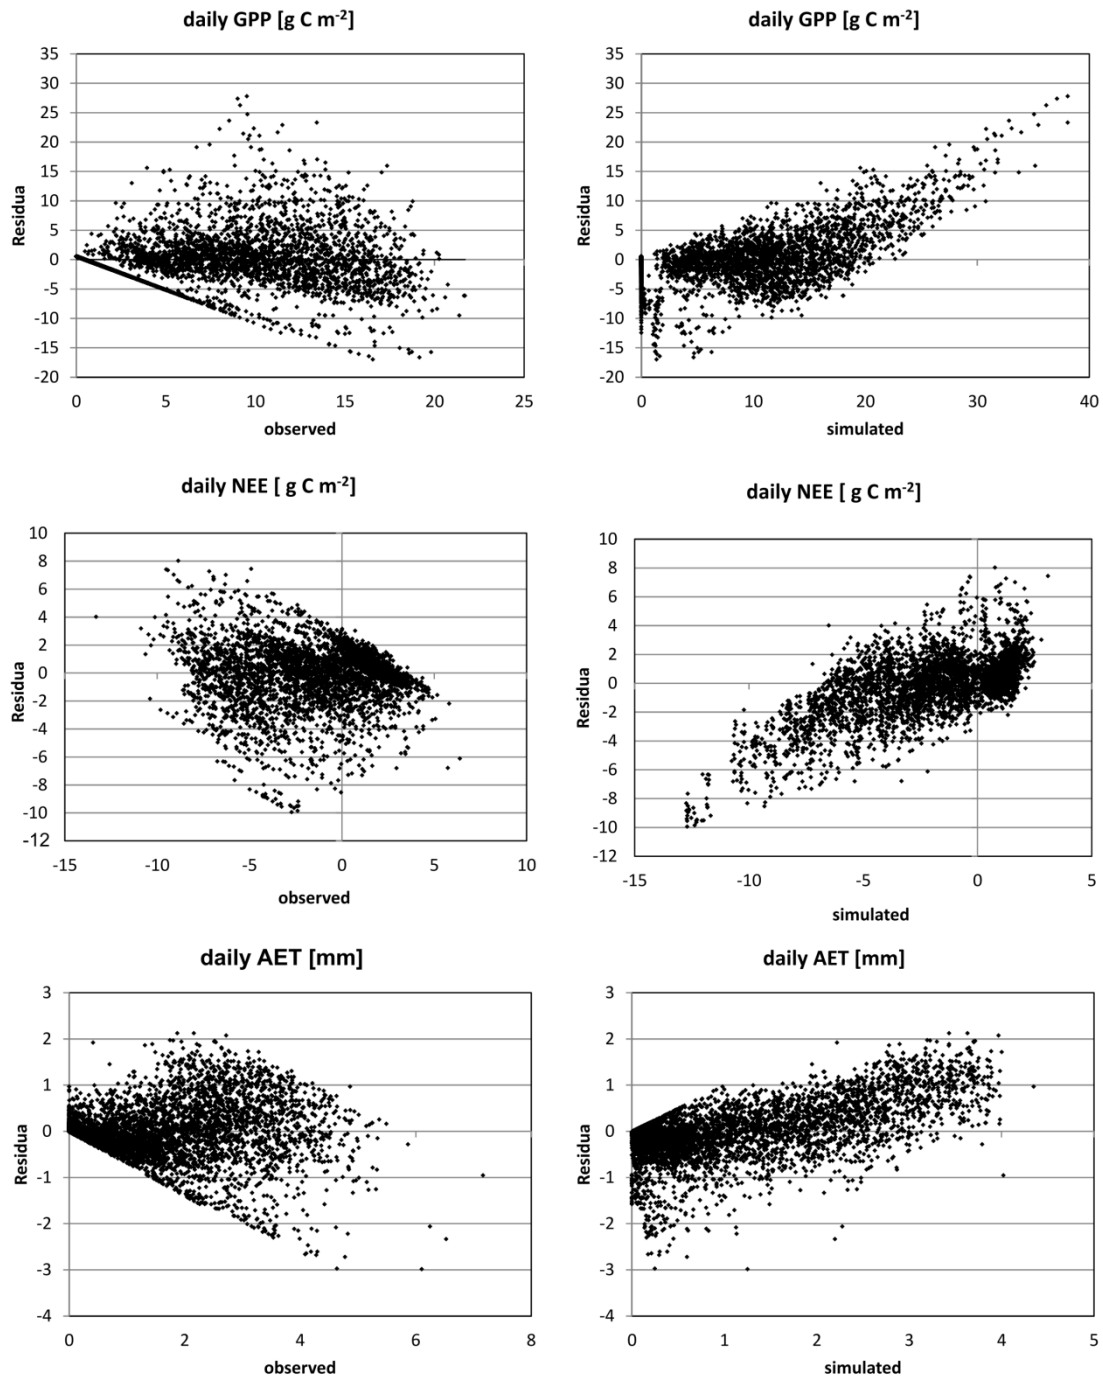

Figure S4 Residual plots of GPP, NEE and AET for Sorø; 1996-2012

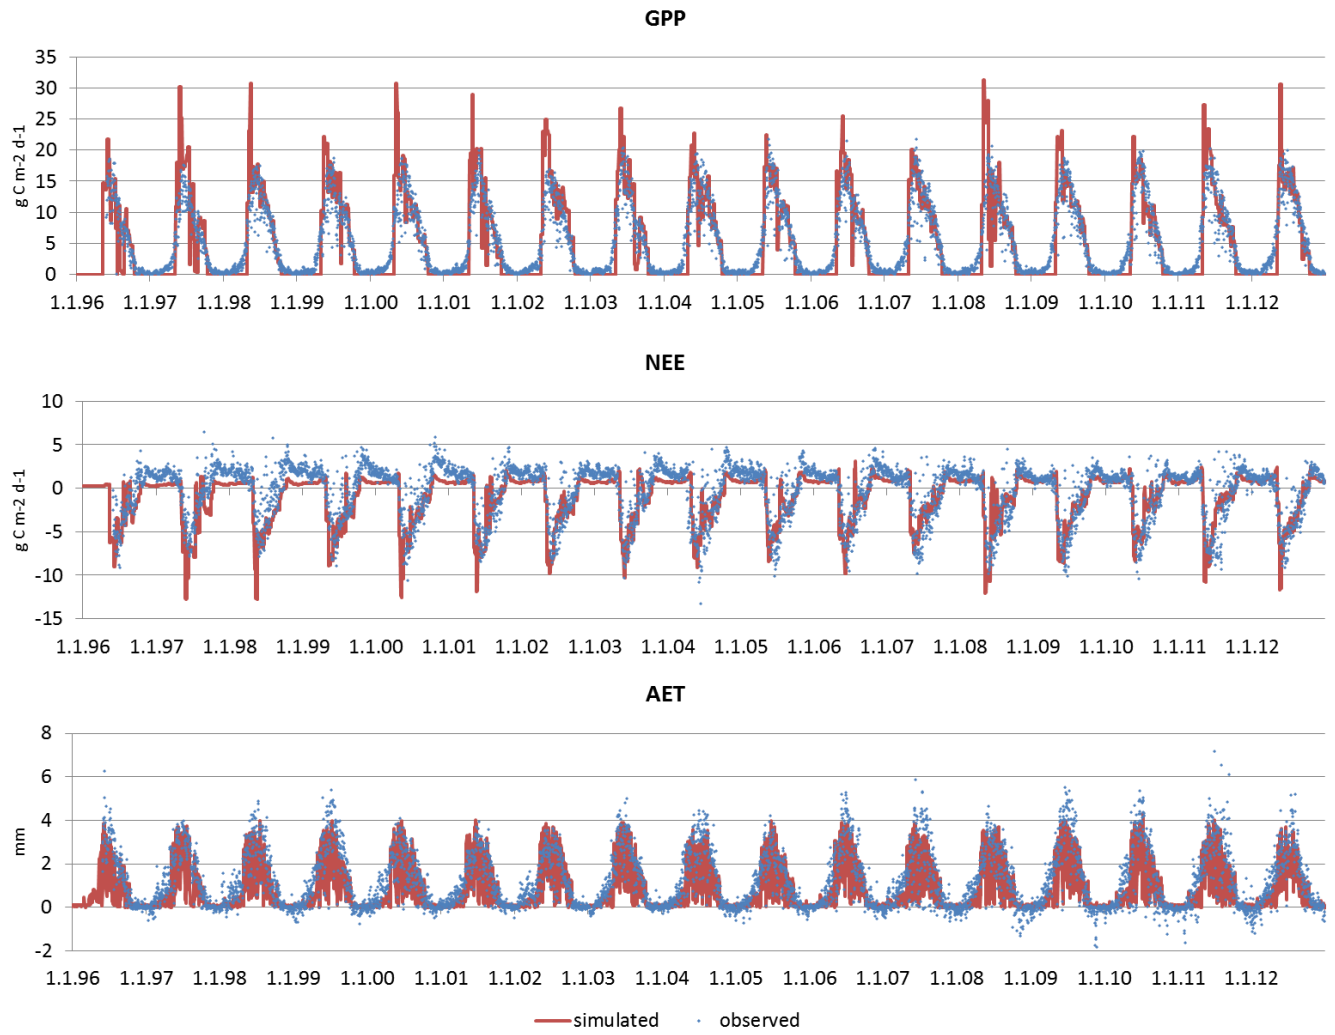

Figure S5 Time series of GPP, NEE, and AET for Sorø; 1996-2012



### S3.1.2 Graphical analysis monthly data Sorø

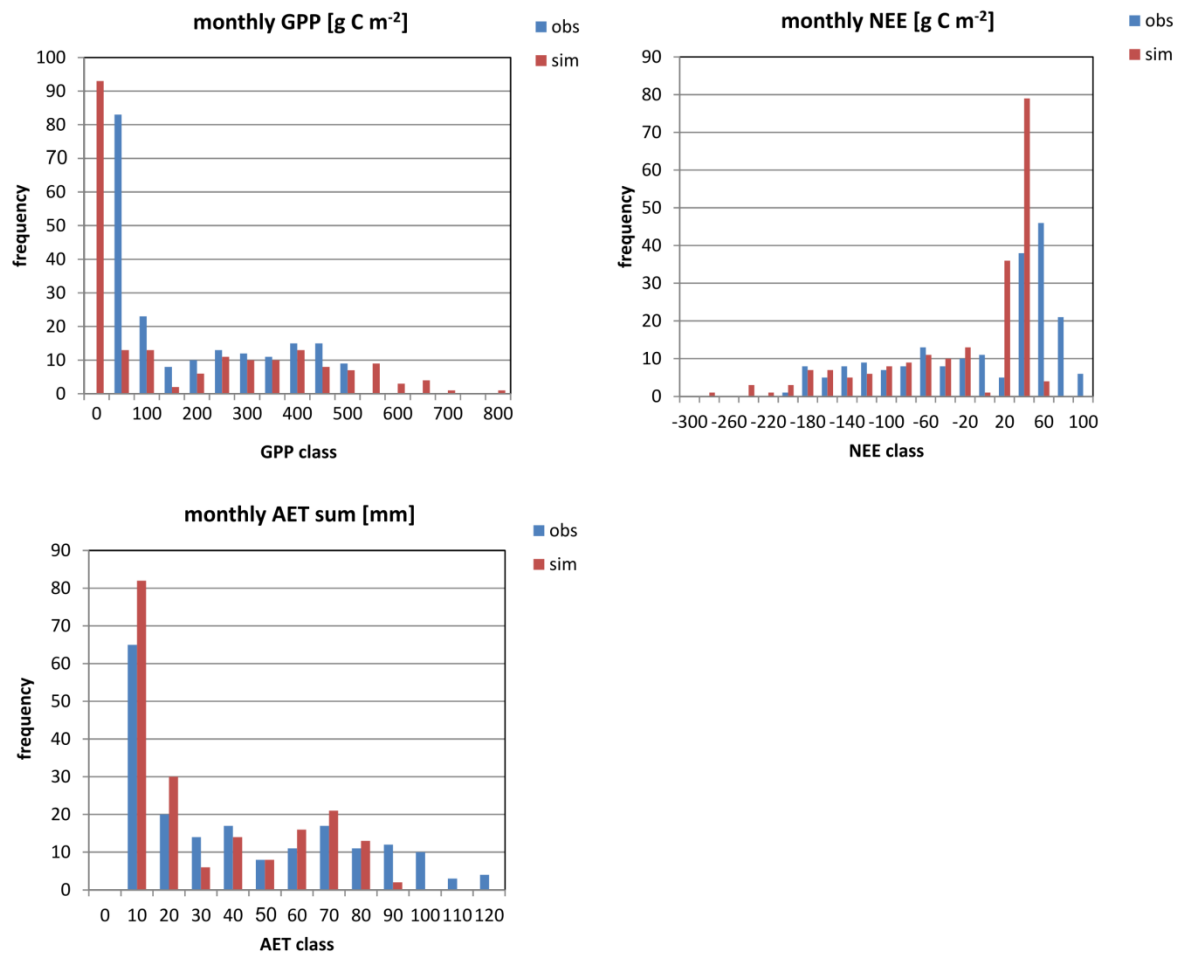

Figure S6 Frequency plots of monthly data of GPP, NEE and AET for Sorø; 1996-2012

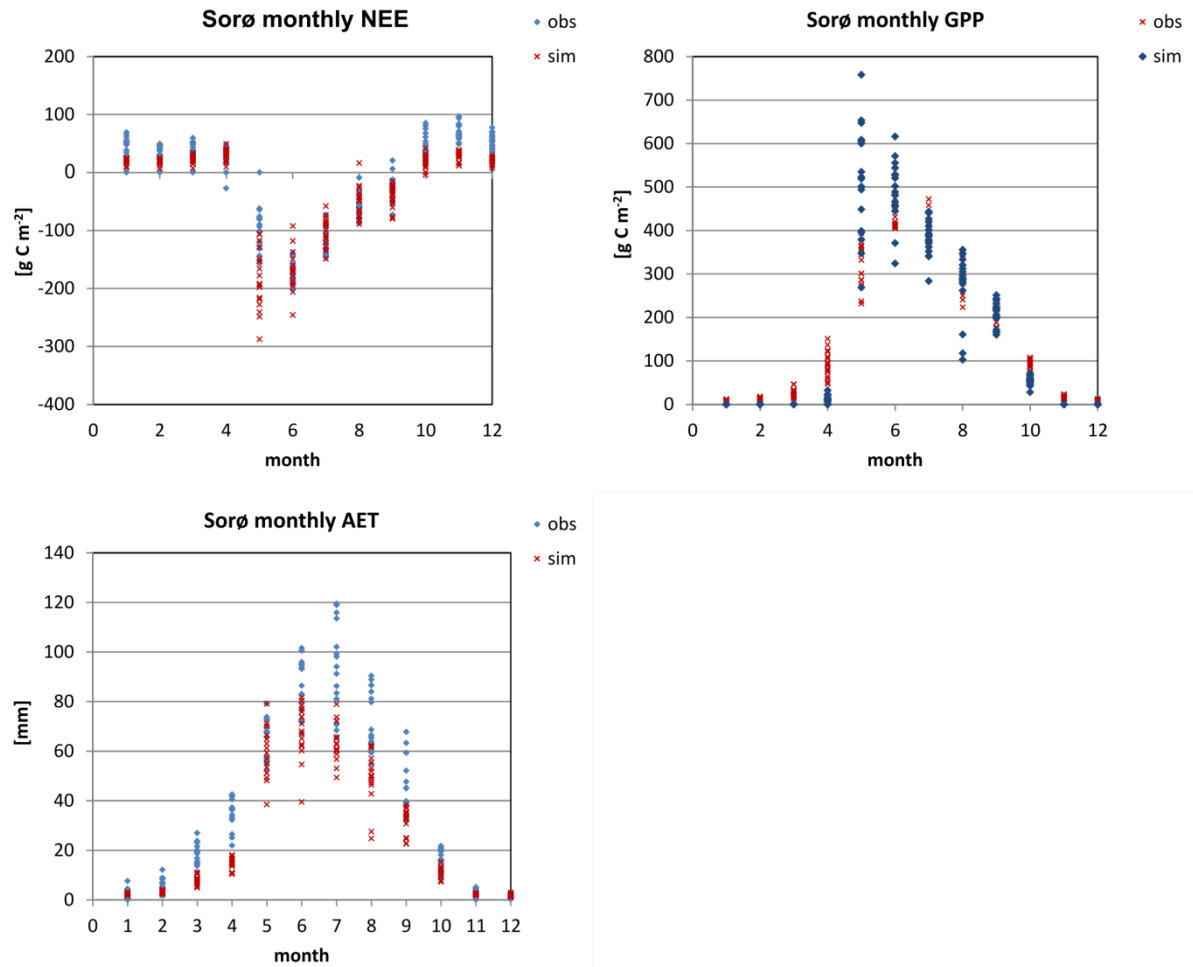

**Figure S7** Seasonal cycle of monthly GPP, NEE and AET values obs - observed, sim - simulated for Sorø

## S3.2 Hyytiälä

### S3.2.1 Graphical analysis daily data Hyytiälä

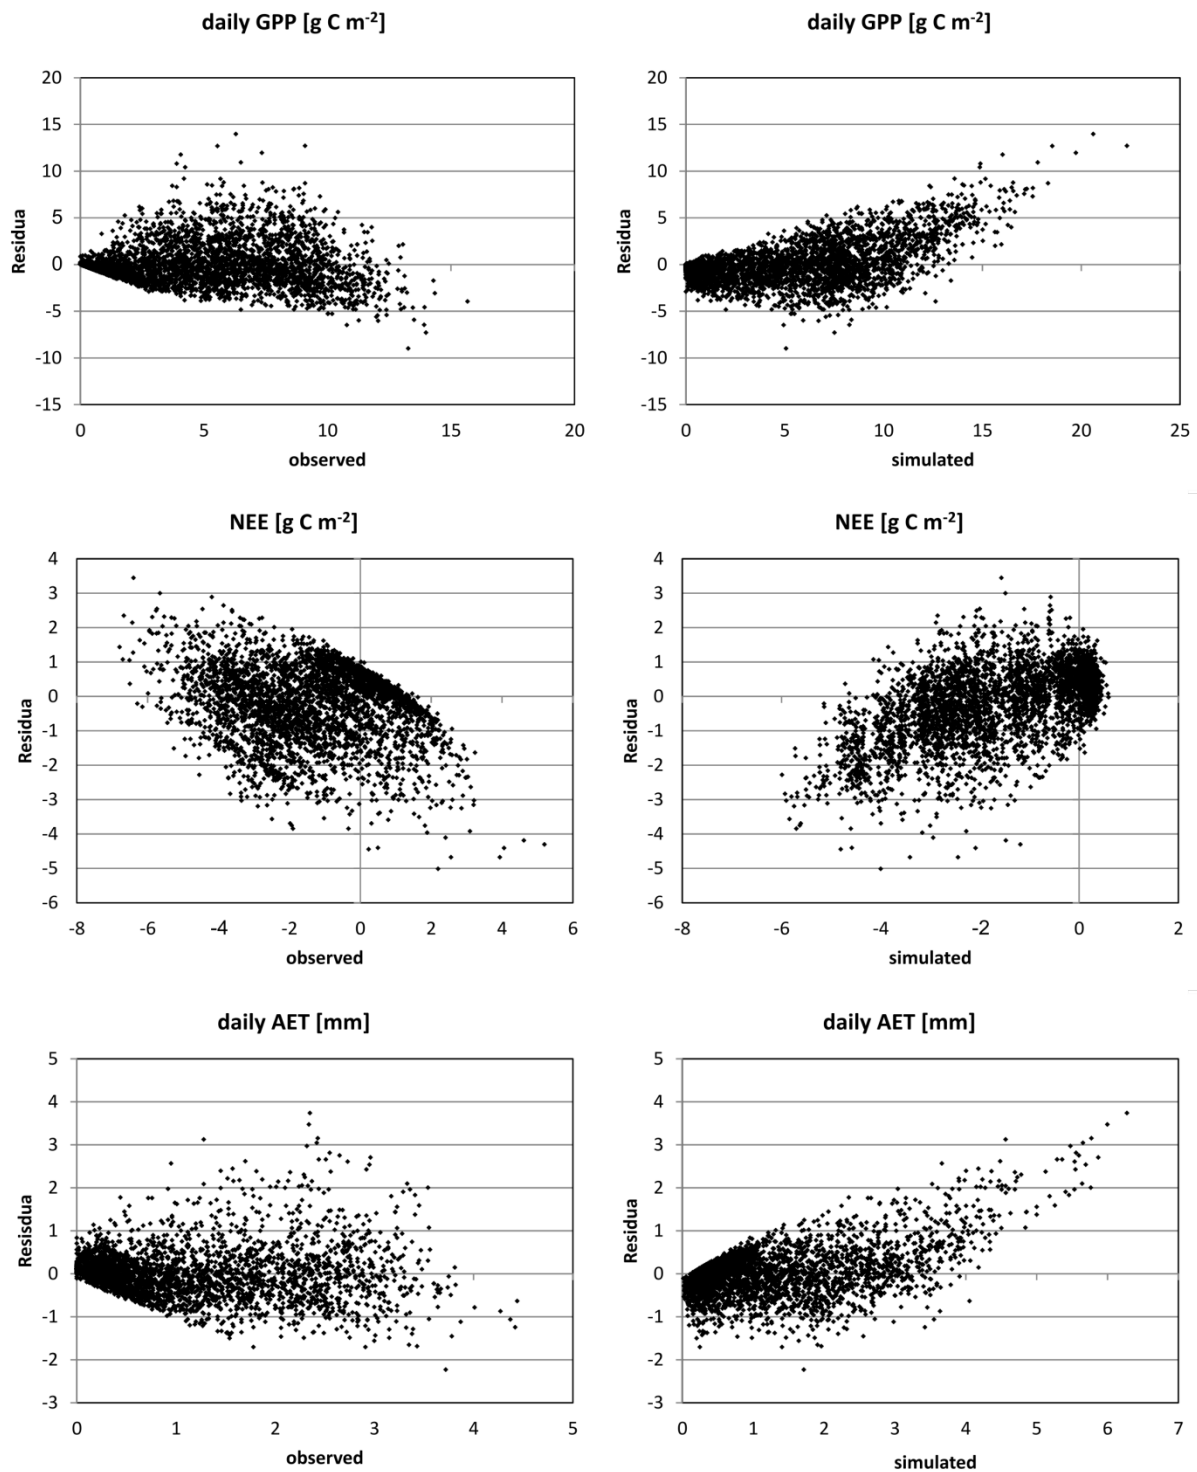

Figure S8 Residual plots of GPP, NEE and AET for Hyytiälä; 1996-2014

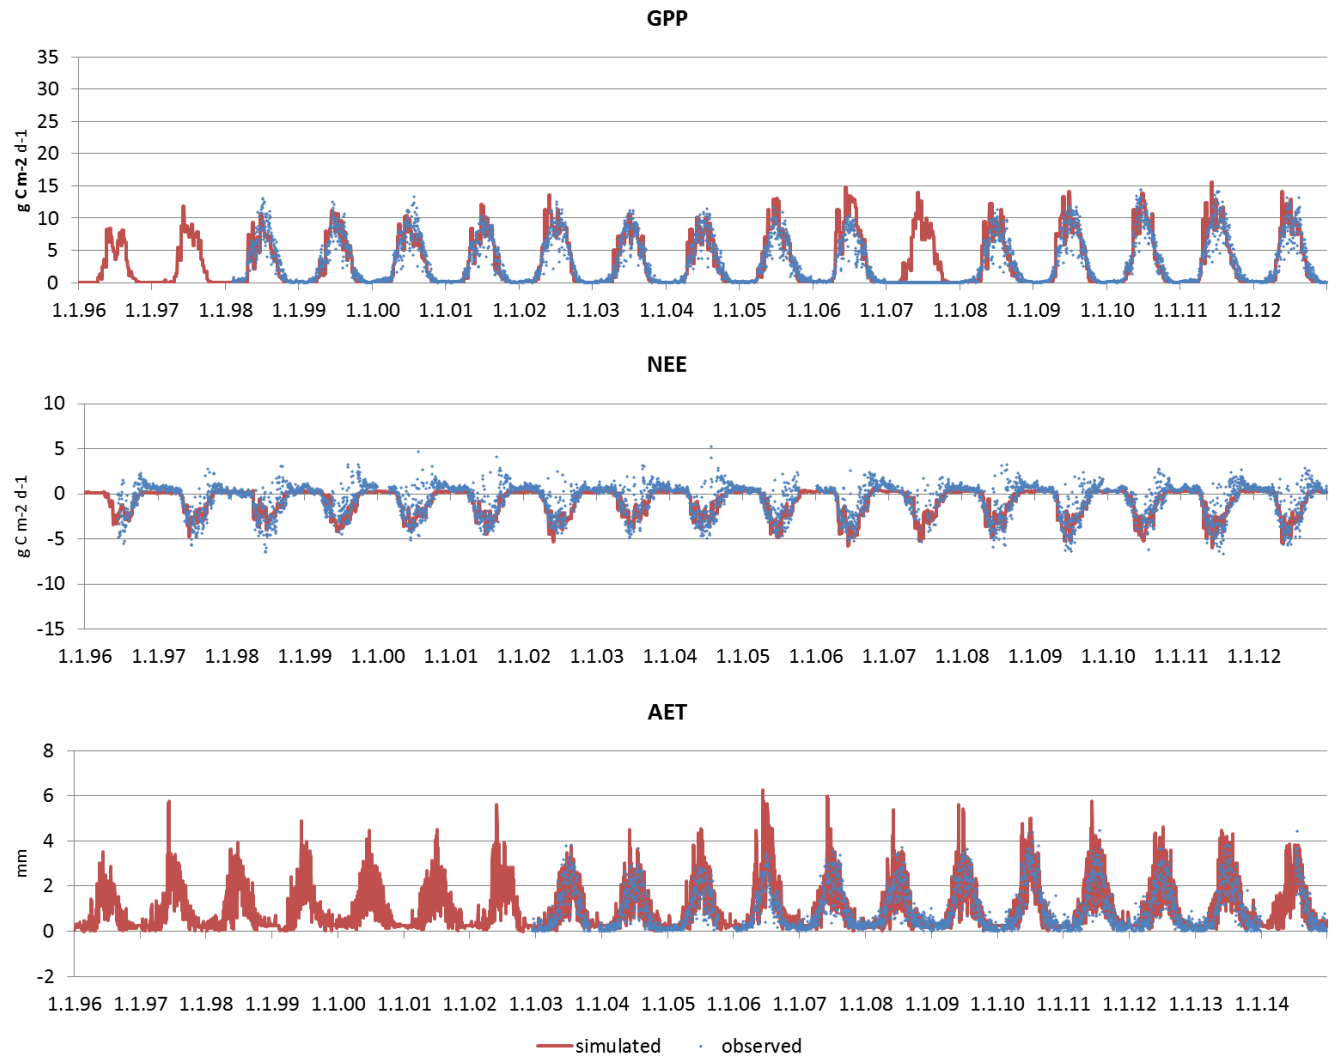

**Figure S9 Time series of GPP, NEE, and AET for Hyytiälä; 1996-2014**

### S3.2.2 Graphical analysis monthly data Hyytiälä

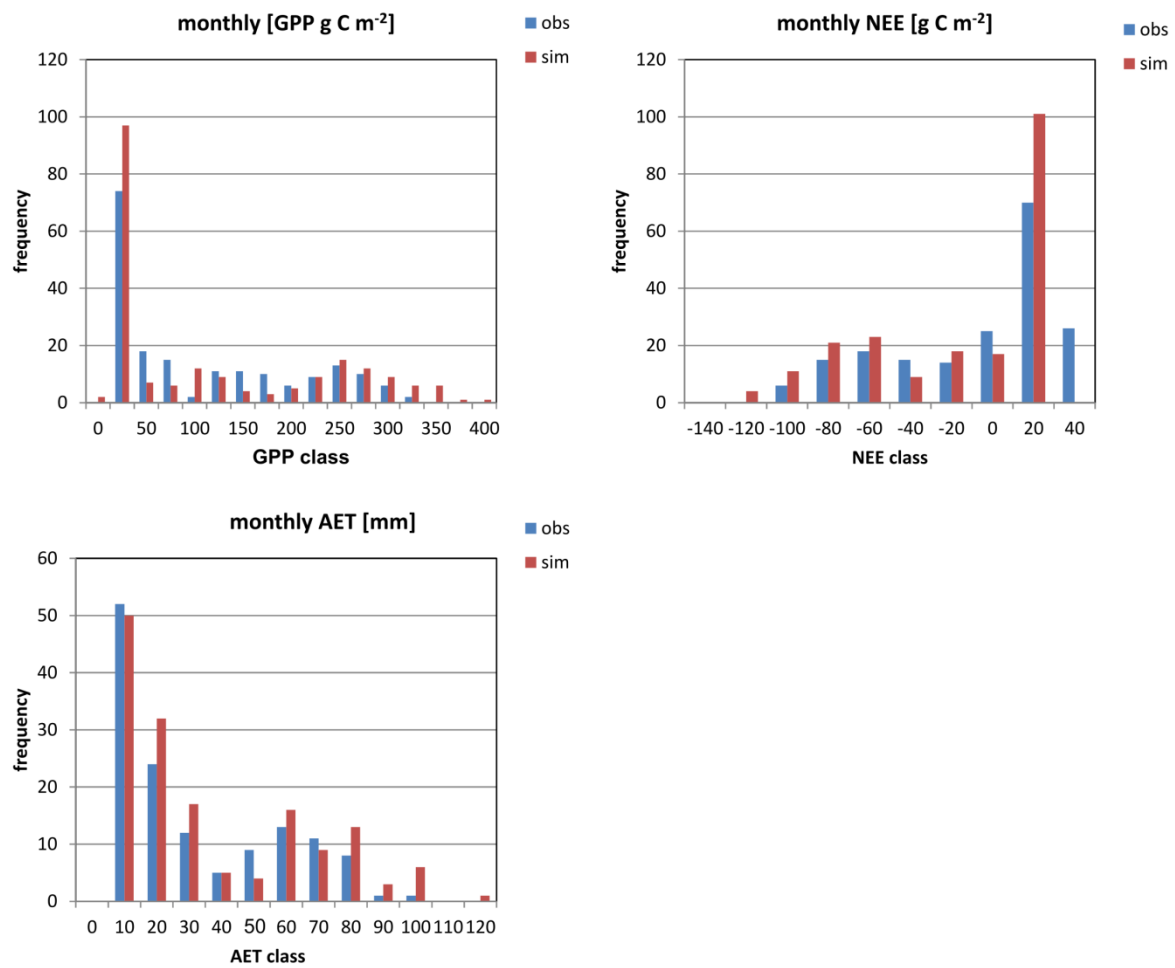

Figure S10 Frequency plots of monthly GPP, NEE, and AET for Hyytiälä; 1996-2014

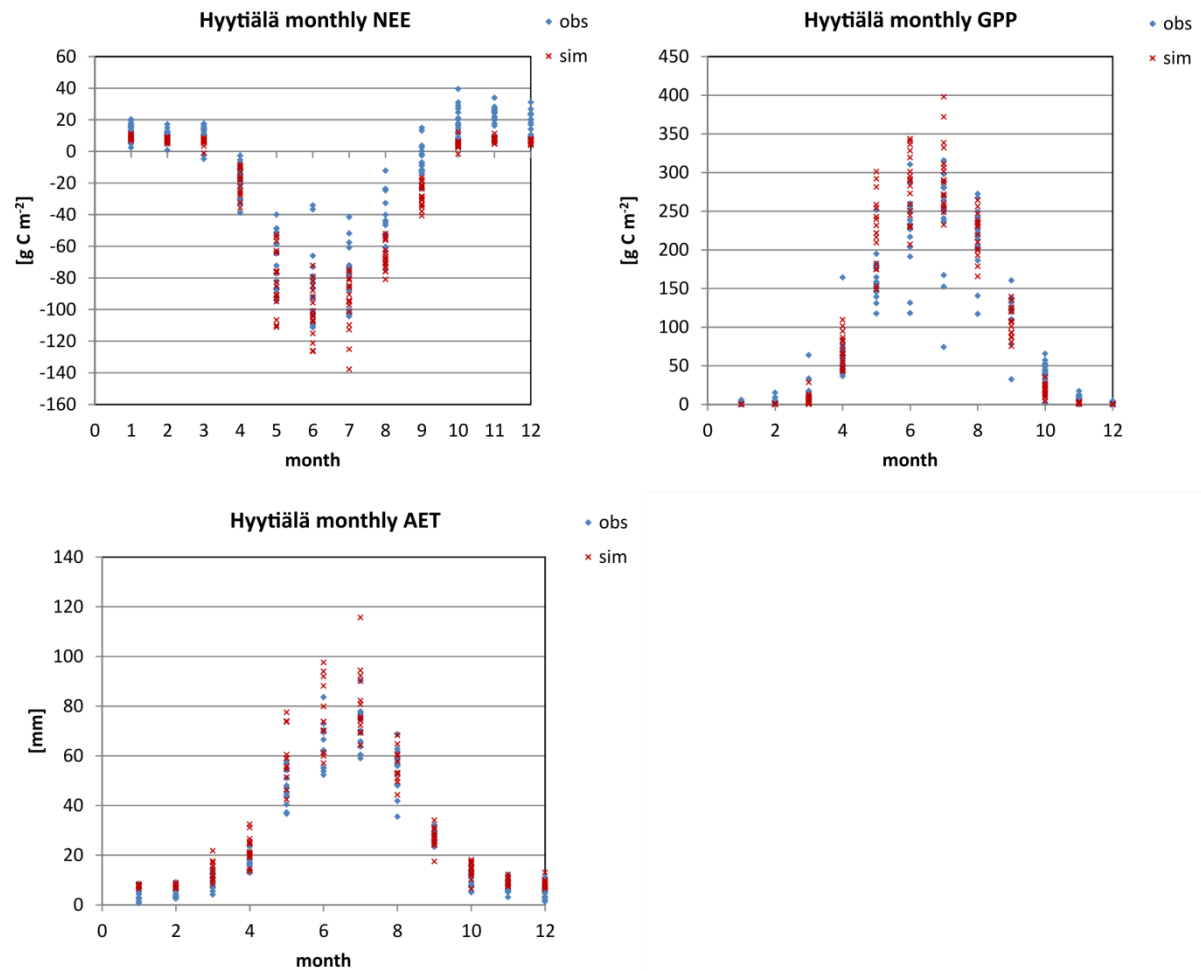

Figure S11 Seasonal cycle of monthly GPP, NEE and AET values obs - observed, sim - simulated in Hyytiälä

### S3.2.3 Graphical analysis of soil temperature and water content Hyytiälä

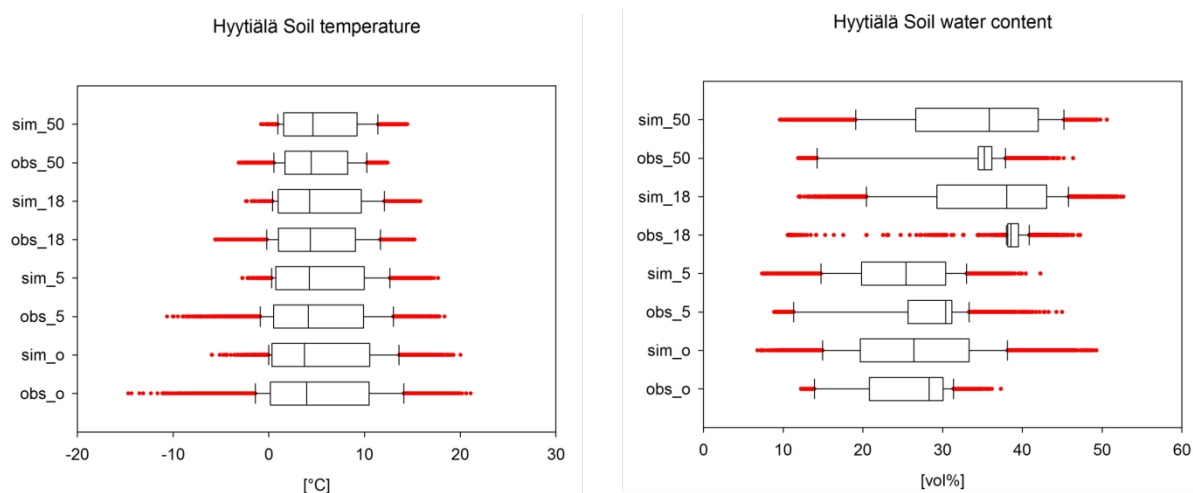

**Figure S4.** Distribution of magnitude of daily soil temperature and soil water content observed and simulated in different soil layers organic layer, layer in 5, 18, and 50 depth in Hyytiälä. The graph shows the median, the 25<sup>th</sup> and 75<sup>th</sup> percentiles box, the 10<sup>th</sup> and 90<sup>th</sup> percentiles whiskers and the outliers (red dots).

### S3.3 Analysis of deviations of actual evapotranspiration

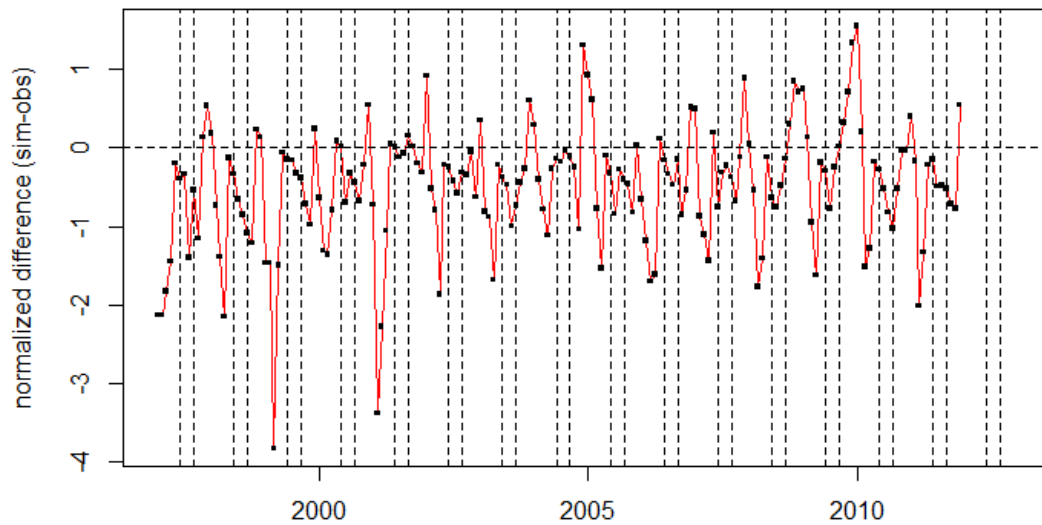

**Figure S13.** Normalized difference between simulated and observed monthly AET values for the Sorø site. Normalization was done by dividing the mean monthly difference by the mean monthly simulated value. The vertical dashed lines frame the period between June and September.

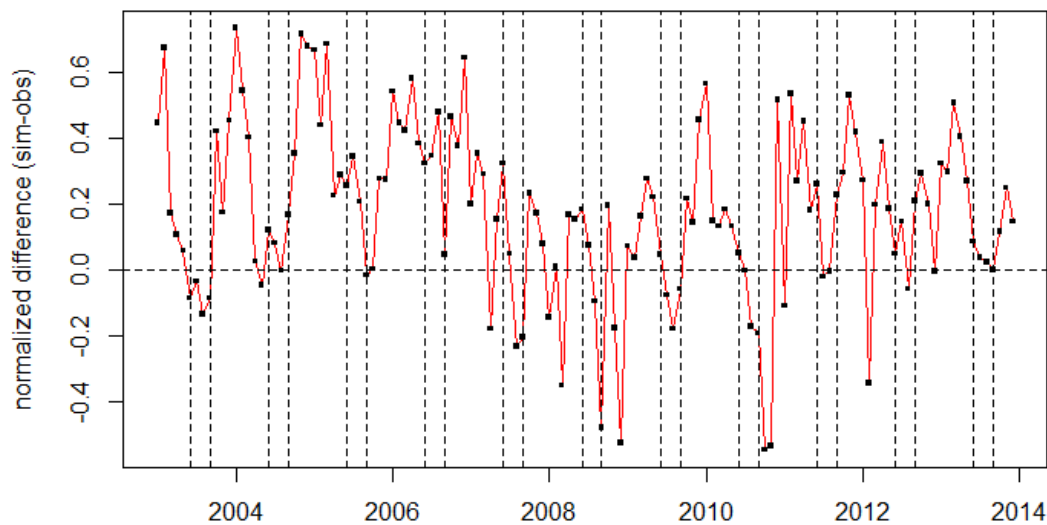

**Figure S14.** Normalized difference between simulated and observed monthly AET values for the Hyytiälä site. Normalization was done by dividing the mean monthly difference by the mean monthly simulated value. The vertical dashed lines frame the period between June and September.



## S4 SOIL TEMPERATURE AND WATER CONTENT HYYTIÄLÄ

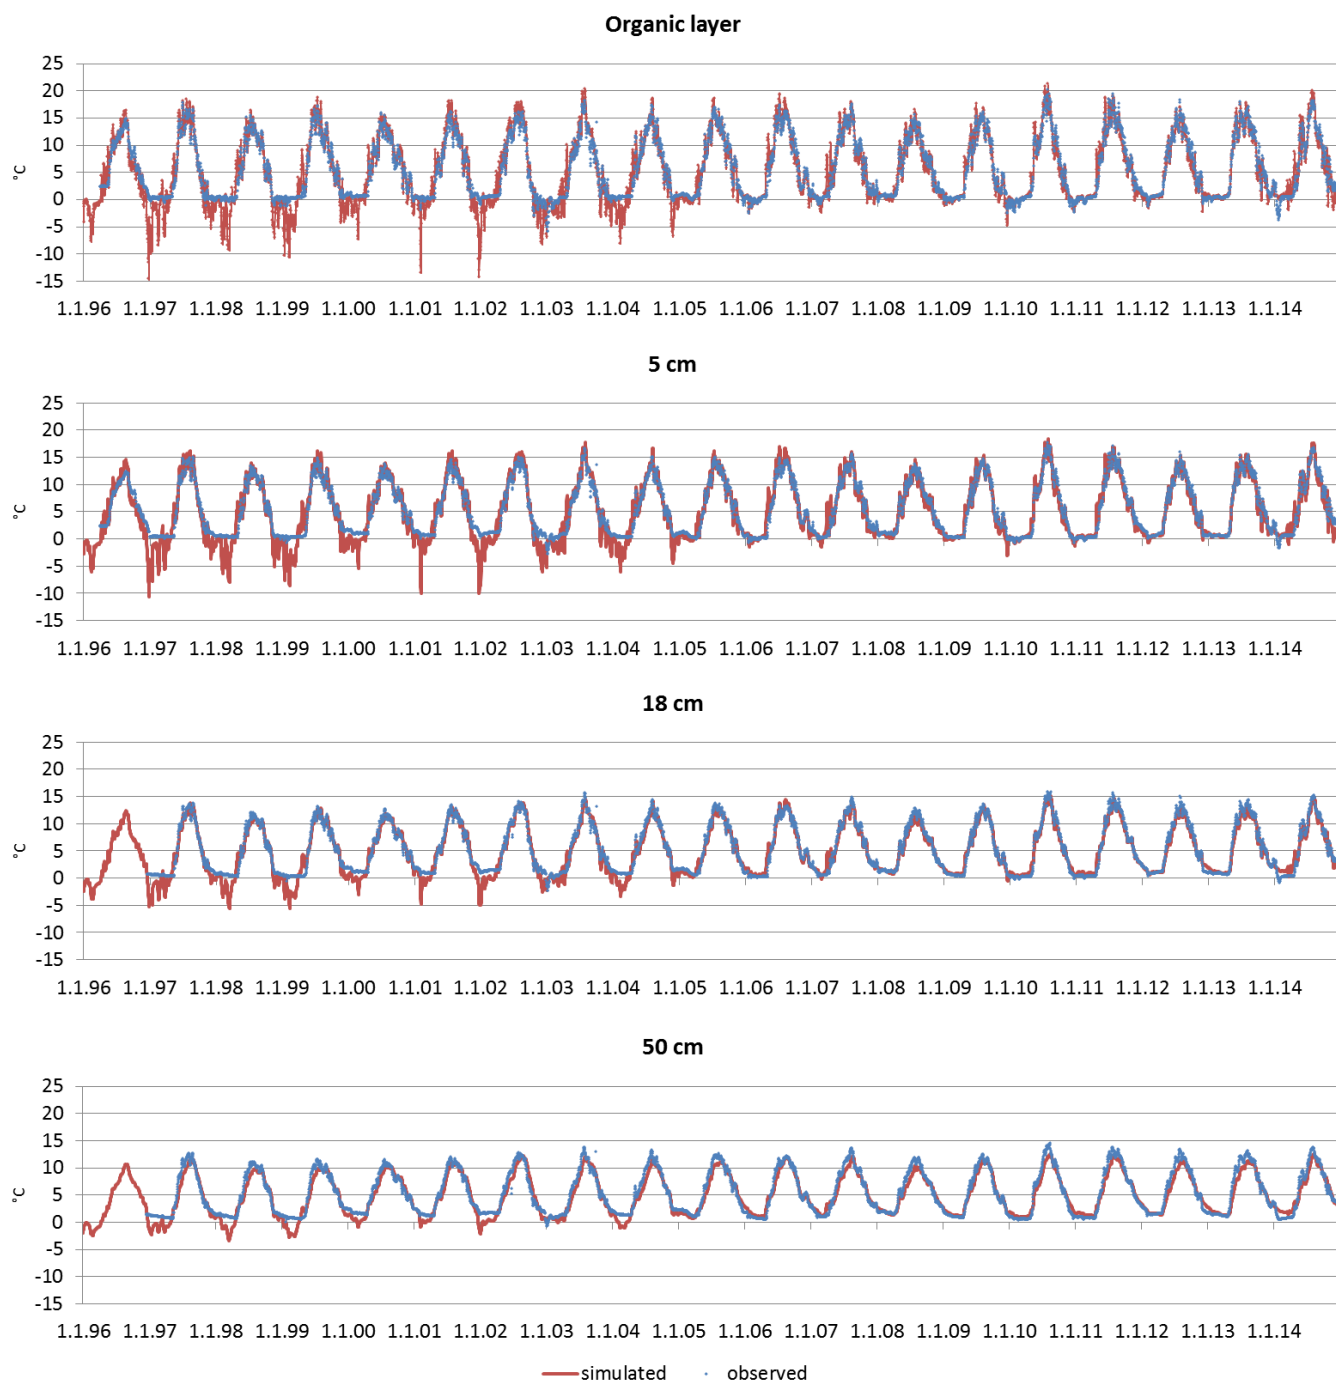

**Figure S15.** Time series of observed and simulated daily soil temperature for the organic layer and at 5, 18, and 50 cm depth in Hyytiälä for the period 1996–2014.

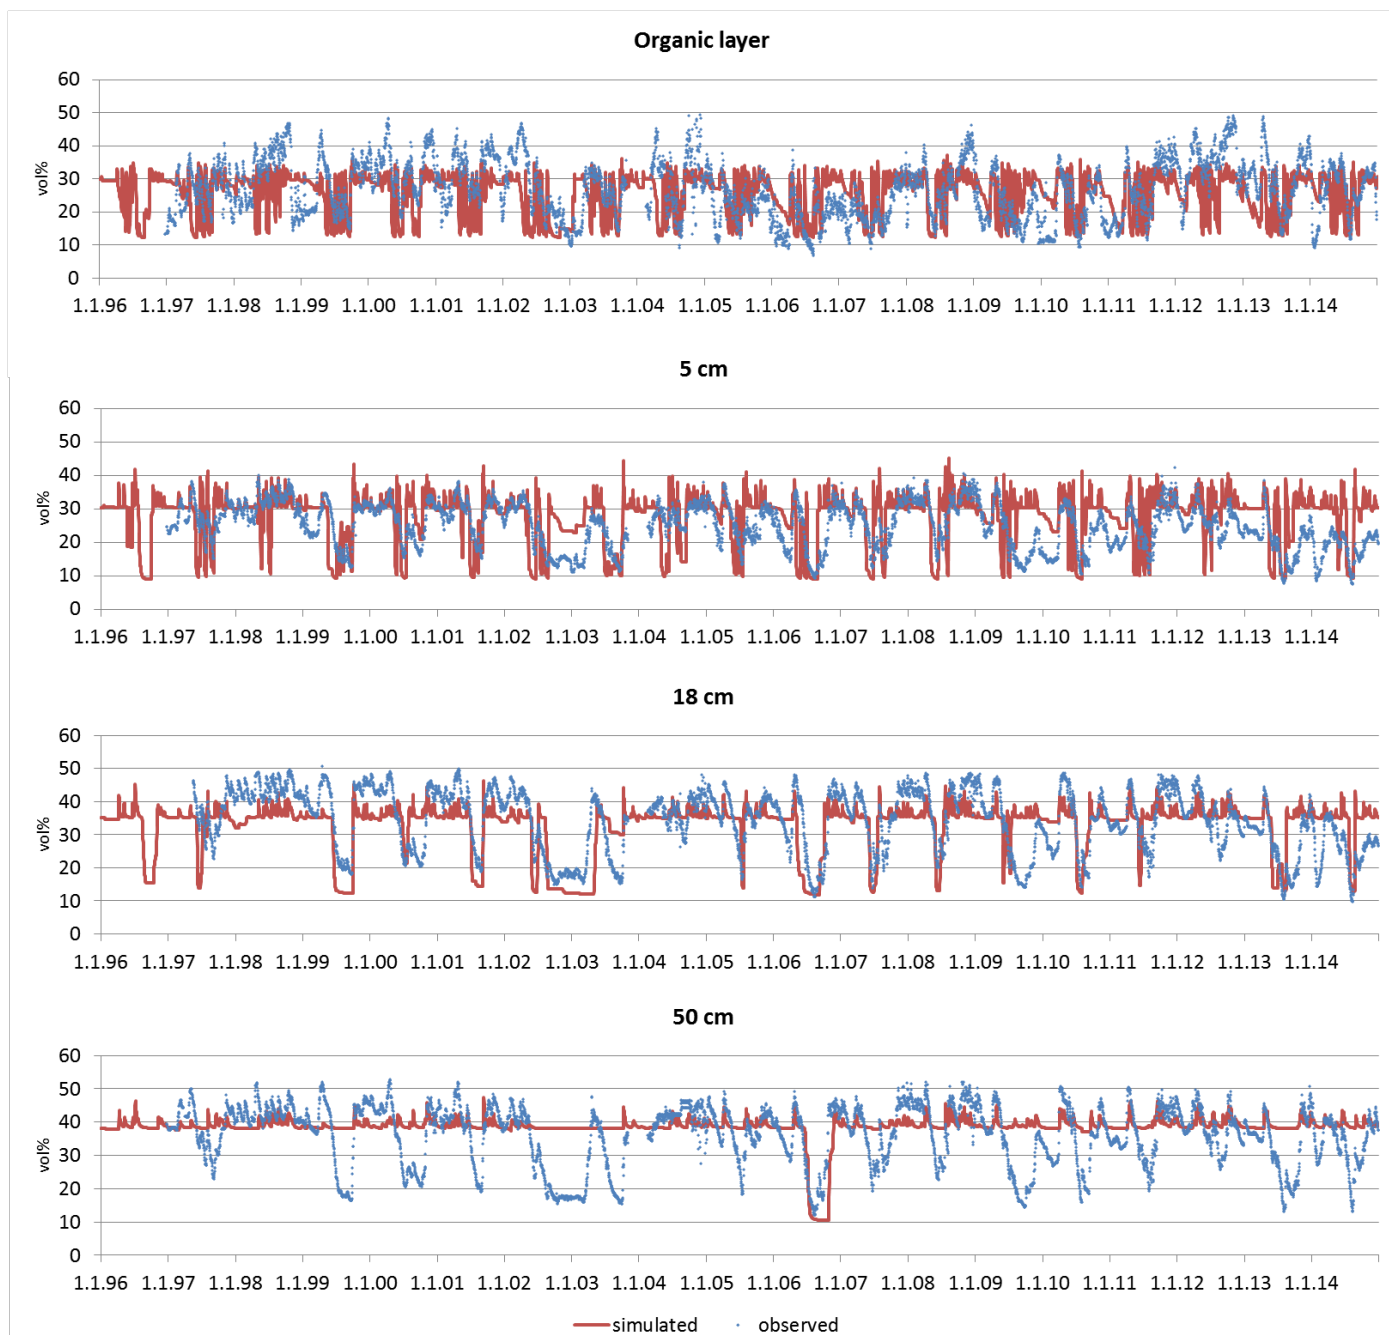

**Figure S16.** Time series of observed and simulated daily soil water content for the organic layer and at 5, 18, and 50 cm depth in Hyytiälä for the period 1996–2014.

## S5 ADDITIONAL DATA

**Table S2 Characteristics of the soil profiles of Peitz, Solling, Hyytiälä, and Sorø**

|                | Soil layers         |             |       |                 |       |               |             |                          |               |                                       |      |       |                      |
|----------------|---------------------|-------------|-------|-----------------|-------|---------------|-------------|--------------------------|---------------|---------------------------------------|------|-------|----------------------|
|                | Upper depth<br>[cm] | Lower depth | Clay  | Silt<br>[mass%] | Sand  | Stone content | Pore volume | Field capacity<br>[vol%] | Wilting point | Bulk density<br>[g cm <sup>-3</sup> ] | pH   | C/N   | C-content<br>[mass%] |
| <b>Peitz</b>   | 6.0                 | 0.0         | 0.00  | 0.00            | 0.00  | 0.00          | 81.52       | 30.00                    | 12.00         | 0.26                                  | 2.89 | 22.60 | 42.25                |
|                | 0.0                 | 5.0         | 7.00  | 6.00            | 87.00 | 0.00          | 44.00       | 26.00                    | 7.50          | 1.12                                  | 2.88 | 33.57 | 2.60                 |
|                | 5.0                 | 10.0        | 7.00  | 6.00            | 87.00 | 0.00          | 44.00       | 26.00                    | 7.50          | 1.39                                  | 3.33 | 46.39 | 0.90                 |
|                | 10.0                | 20.0        | 7.00  | 2.00            | 91.00 | 0.00          | 44.00       | 26.00                    | 7.50          | 1.30                                  | 3.72 | 41.95 | 0.78                 |
|                | 20.0                | 30.0        | 7.00  | 2.00            | 91.00 | 0.00          | 44.00       | 26.00                    | 7.50          | 1.40                                  | 4.10 | 44.45 | 0.45                 |
|                | 30.0                | 40.0        | 7.00  | 2.00            | 91.00 | 0.00          | 44.00       | 26.00                    | 7.50          | 1.37                                  | 4.16 | 58.47 | 0.18                 |
|                | 40.0                | 60.0        | 7.00  | 2.00            | 91.00 | 0.00          | 44.00       | 26.00                    | 7.50          | 1.60                                  | 4.20 | 23.33 | 0.07                 |
|                | 60.0                | 130.0       | 0.70  | 1.30            | 98.00 | 0.00          | 52.00       | 25.00                    | 9.00          | 1.60                                  | 4.20 | 25.00 | 0.05                 |
|                | 130.0               | 200.0       | 3.00  | 1.00            | 96.00 | 0.00          | 52.00       | 25.00                    | 9.00          | 1.60                                  | 4.20 | 0.00  | 0.00                 |
| <b>Solling</b> | 5.8                 | 0.0         | 0.00  | 0.00            | 0.00  | 0.00          | 89.80       | 34.00                    | 7.00          | 0.14                                  | 2.88 | 25.52 | 49.69                |
|                | 0.0                 | 5.0         | 19.67 | 71.07           | 9.27  | 0.83          | 60.99       | 47.94                    | 13.74         | 0.82                                  | 2.83 | 18.57 | 5.29                 |
|                | 5.0                 | 10.0        | 19.67 | 71.07           | 9.27  | 5.00          | 60.99       | 47.94                    | 13.74         | 1.02                                  | 3.21 | 17.39 | 2.94                 |
|                | 10.0                | 20.0        | 19.67 | 71.07           | 9.27  | 4.67          | 60.99       | 47.94                    | 13.74         | 1.05                                  | 3.69 | 16.18 | 2.06                 |
|                | 20.0                | 40.0        | 19.50 | 71.20           | 9.30  | 3.83          | 59.20       | 48.93                    | 13.72         | 1.11                                  | 4.11 | 13.01 | 1.22                 |
|                | 40.0                | 80.0        | 23.80 | 61.13           | 15.07 | 20.00         | 40.61       | 35.58                    | 18.88         | 1.37                                  | 3.99 | 6.69  | 0.31                 |

|          | Soil layers         |             |       |                 |       |               |             |                          |               |                                       |      |       |                      |
|----------|---------------------|-------------|-------|-----------------|-------|---------------|-------------|--------------------------|---------------|---------------------------------------|------|-------|----------------------|
|          | Upper depth<br>[cm] | Lower depth | Clay  | Silt<br>[mass%] | Sand  | Stone content | Pore volume | Field capacity<br>[vol%] | Wilting point | Bulk density<br>[g cm <sup>-3</sup> ] | pH   | C/N   | C-content<br>[mass%] |
|          | 80.0                | 100.0       | 31.80 | 46.60           | 21.60 | 23.00         | 37.32       | 36.40                    | 24.48         | 1.56                                  | 3.84 | 2.73  | 0.10                 |
|          | 100.0               | 150.0       | 31.80 | 46.60           | 21.60 | 96.00         | 35.50       | 30.60                    | 26.50         | 2.10                                  | 4.50 | 0.00  | 0.00                 |
| Hyytiälä | 6.0                 | 0.0         | 0.00  | 0.00            | 0.00  | 0.00          | 85.71       | 70.00                    | 12.00         | 0.20                                  | 3.25 | 28.60 | 36.95                |
|          | 0.0                 | 5.5         | 6.34  | 14.18           | 79.48 | 26.17         | 48.93       | 30.38                    | 8.52          | 0.74                                  | 3.41 | 33.49 | 3.89                 |
|          | 5.5                 | 22.5        | 5.72  | 12.90           | 81.38 | 28.65         | 50.77       | 28.33                    | 11.61         | 0.73                                  | 4.30 | 26.28 | 2.71                 |
|          | 22.5                | 56.0        | 6.77  | 15.02           | 78.21 | 29.64         | 37.84       | 29.07                    | 10.06         | 1.27                                  | 4.35 | 46.50 | 0.37                 |
|          | 56.0                | 89.0        | 7.88  | 10.89           | 81.23 | 43.50         | 28.26       | 22.21                    | 12.09         | 1.45                                  | 4.54 | 27.60 | 0.14                 |
|          | 89.0                | 10.0        | 7.88  | 10.89           | 81.23 | 43.50         | 28.00       | 22.00                    | 10.00         | 1.50                                  | 4.60 | 0.00  | 0.00                 |
| Sorø     | 6.0                 | 0.0         | 0.00  | 0.00            | 0.00  | 0.00          | 92.86       | 26.40                    | 13.10         | 0.10                                  | 4.66 | 15.86 | 12.70                |
|          | 0.0                 | 11.0        | 10.10 | 31.00           | 58.90 | 0.00          | 42.00       | 18.90                    | 8.70          | 1.29                                  | 3.33 | 14.62 | 3.23                 |
|          | 11.0                | 33.0        | 12.70 | 27.40           | 59.90 | 0.00          | 42.00       | 15.40                    | 6.40          | 1.61                                  | 3.92 | 14.51 | 0.74                 |
|          | 33.0                | 50.0        | 24.40 | 18.30           | 57.30 | 0.00          | 43.00       | 24.20                    | 14.80         | 1.45                                  | 5.13 | 9.44  | 0.68                 |
|          | 50.0                | 77.0        | 13.90 | 15.10           | 71.00 | 0.00          | 42.00       | 19.00                    | 9.10          | 1.46                                  | 7.04 | 25.37 | 1.04                 |
|          | 77.0                | 100.0       | 13.90 | 15.10           | 71.00 | 0.00          | 42.00       | 19.00                    | 9.10          | 1.88                                  | 1.32 | 25.00 | 1.21                 |
|          | 100.0               | 150.0       | 13.90 | 15.10           | 71.00 | 0.00          | 42.00       | 19.00                    | 9.10          | 1.88                                  | 1.32 | 0.00  | 0.00                 |

**Table S3 Available time series of observed data, partially with gaps**

| Observed data                      | Peitz     | Solling   | Hyytiälä  | Sorø      |
|------------------------------------|-----------|-----------|-----------|-----------|
| <b>Annual data</b>                 |           |           |           |           |
| Medium height of dominant trees HO | 1966-2010 | -         | -         | -         |
| Mean height of all trees MH        | -         | 1967-2010 | 1995-2011 |           |
| Diameter at breast height DBH      |           | 1967-2010 | 1995-2011 | -         |
| Geometric mean diameter DG         | 1966-2010 | -         | -         | -         |
| Stem biomass STBIOM                | -         | 1967-2010 | 1995-2011 | -         |
| Stem volume STVOL                  | 1966-2010 | -         | -         | -         |
| Number of trees                    | 1966-2010 | 1967-2010 | 1995-2011 | -         |
| Net ecosystem production NEP       | -         | -         | 1995-2014 | 1997-2012 |
| Gross primary productivity GPP     | -         | -         | 1995-2014 | 1997-2012 |
| Actual evapotranspiration AET      | -         | -         | 1995-2013 | 1997-2012 |
| <b>Daily data</b>                  |           |           |           |           |
| Net ecosystem exchange NEE         | -         |           | 1996-2014 | 1996-2012 |
| Total ecosystem respiration TER    | -         |           | 1998-2014 | 1996-2012 |
| Gross primary productivity GPP     | -         |           | 1998-2014 | 1996-2012 |
| Actual evapotranspiration AET      | -         |           | 2003-2014 | 1996-2012 |
| Soil temperature organic layer     | -         |           | 1996-2014 | -         |
| Soil temperature 2 cm              | -         |           | -         | 1996-2012 |
| Soil temperature 5 cm 0 – 10 cm    | -         |           | 1996-2014 | 1996-2012 |
| Soil temperature 18 cm 10 – 25 cm  | -         |           | 1997-2014 | -         |
| Soil temperature 50 cm 40 – 60 cm  | -         |           | 1997-2014 | -         |
| Water content                      | -         |           | 1997-2014 | -         |

| Observed data                     | Peitz | Solling | Hyytiälä  | Sorø      |
|-----------------------------------|-------|---------|-----------|-----------|
| organic layer                     |       |         |           |           |
| Water content 5 cm<br>0 – 10 cm   | -     |         | 1997-2014 | -         |
| Water content 8 cm<br>0-16 cm     | -     |         | -         | 1996-2012 |
| Water content<br>18 cm 10 – 25 cm | -     |         | 1997-2014 | -         |
| Water content<br>50 cm 40 – 60 cm | -     |         | 1997-2014 | -         |

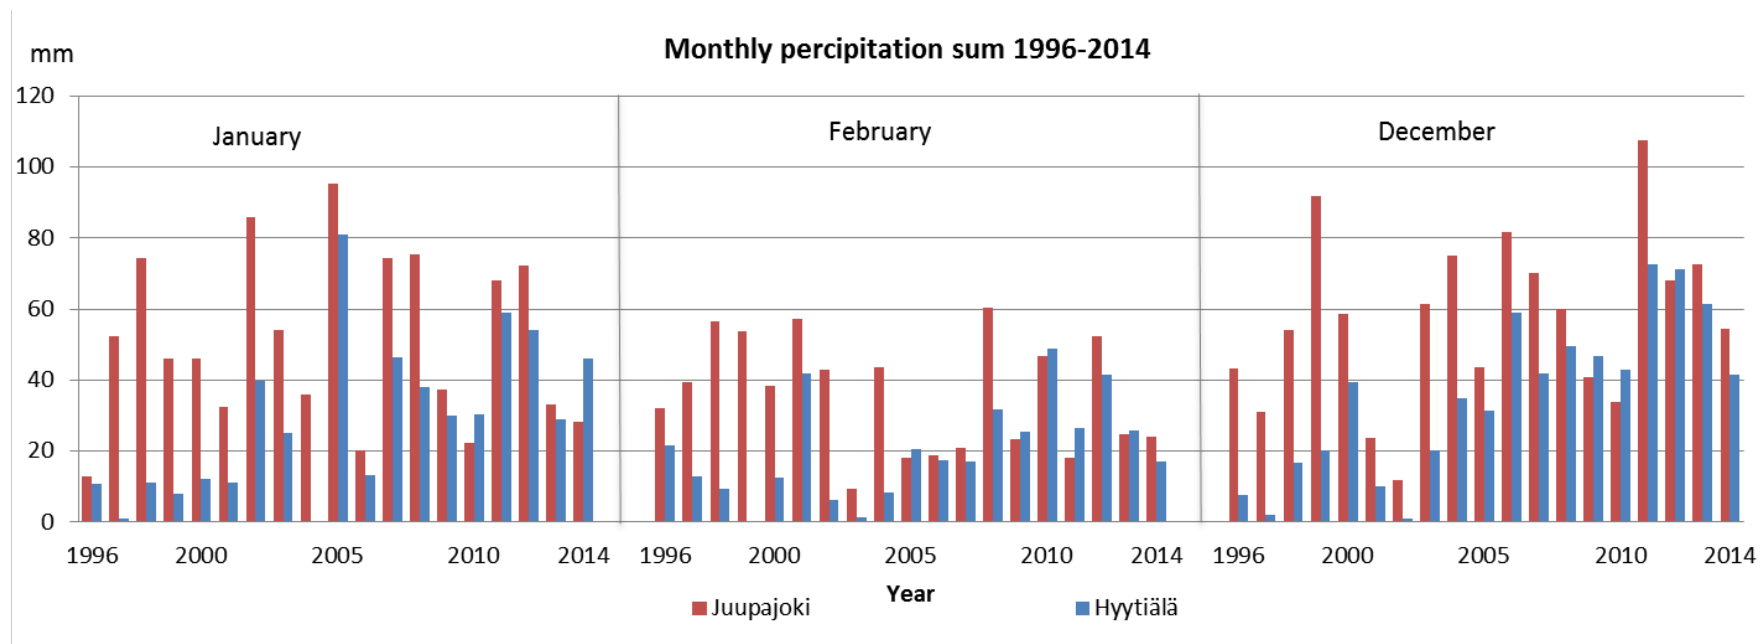

Figure S17 Monthly precipitation sum of the winter month 1996-2014. Comparison of the data from the observation station Hyytiälä and the nearby weather station of the Finnish Meteorological Institute Juupajoki <https://en.ilmatieteenlaitos.fi/download-observations#!/>, download 23.02.2018. The distance between the two stations is about 300 m.

## REFERENCES

- Badeck, F.W. et al., 2005. Adaptive Forest Management at the Scale of the Forest Management Units. In: S. Kellomäki and S. Leinonen Editors, Management of European Forests under Changing Climatic Conditions. University of Joensuu, Faculty of Forestry, Joensuu, Fi, pp. 315 - 382.
- Borys, A. et al., 2015. Ökonomische Analyse der Kohlenstoffsequestrierung in Buchenbeständen im Kontext von Waldpflege und Klimawandel. Allg. Forst- u. J. Ztg., 1863/4: 72-84.
- Borys, A., Lasch, P., Suckow, F. and Reyer, C., 2013. Kohlenstoffspeicherung in Buchenbeständen in Abhängigkeit von Waldpflege und Klimawandel. Allg. Forst- u. J.-Ztg., 1841/2: 26-35.
- Borys, A., Suckow, F., Reyer, C., Gutsch, M. and Lasch-Born, P., 2016. The impact of climate change under different thinning regimes on carbon sequestration in a German forest district. Mitig Adapt Strateg Glob Change, 216: 861-881.
- Bugmann, H. et al., 2019. Tree mortality submodels drive simulated long-term forest dynamics: assessing 15 models from the stand to global scale. Ecosphere, 102: e02616.
- Fürstenau, C. et al., 2007. Multiple-use forest management in consideration of climate change and the interests of stakeholder groups. European Journal of Forest Research, 1262: 225-239.
- Gerstengarbe, F.-W. et al., 2003. Studie zur klimatischen Entwicklung im Land Brandenburg bis 2055 und deren Auswirkungen auf den Wasserhaushalt, die Forst- und Landwirtschaft sowie die Ableitung erster Perspektiven. 83, PIK, Potsdam.
- Gutsch, M., Lasch-Born, P., Kollas, C., Suckow, F. and Reyer, C.O.P., 2018. Balancing trade-offs between ecosystem services in Germany's forests under climate change. Environmental Research Letters, 134: 045012.
- Gutsch, M. et al., 2015a. Uncertainty of biomass contributions from agriculture and forestry to renewable energy resources under climate change. Meteorologische Zeitschrift, 242: 1-11.
- Gutsch, M., Lasch-Born, P., Suckow, F. and Reyer, C., 2015b. Modeling of Two Different Water Uptake Approaches for Mono- and Mixed-Species Forest Stands. Forests, 66: 2125-2147.
- Gutsch, M., Lasch-Born, P., Suckow, F. and Reyer, C.P.O., 2016. Evaluating the productivity of four main tree species in Germany under climate change with static reduced models. Annals of Forest Science, 732: 401-410.
- Gutsch, M., Lasch, P., Suckow, F. and Reyer, C., 2011. Management of mixed oak-pine forests under climate scenario uncertainty. For. Syst., 203: 453-463.
- Horemans, J., A. et al., 2017. Combining multiple statistical methods to evaluate the performance of process-based vegetation models across three forest stands. Central European Forestry Journal, 634: 153-172.
- Kint, V., Lasch, P., Lindner, M. and Muys, B., 2009. Multipurpose conversion management of Scots pine towards mixed oak-birch stands--A long-term simulation approach. For. Ecol. Manage., 2571: 199-214.



- Kollas, C., Gutsch, M., Hommel, R., Lasch-Born, P. and Suckow, F., 2018. Mistletoe-induced growth reductions at the forest stand scale. *Tree Physiol*, 385: 1-10.
- Kollas, C., Lasch, P., Rock, J. and Suckow, F., 2009. Bioenergy potential in Germany - assessing spatial patterns of biomass production with aspen short-rotation coppice. *International Agrophysics*, 234: 343-352.
- Lasch-Born, P. et al., 2018. Fire, late frost, nun moth and drought risks in Germany's forests under climate change. *Meteorologische Zeitschrift*, 272: 135.-148.
- Lasch-Born, P. et al., 2015. Forests under climate change: potential risks and opportunities. *Meteorologische Zeitschrift*, 242: 157-172.
- Lasch, P., Badeck, F.-W., Lindner, M. and Suckow, F., 2002. Sensitivity of simulated forest growth to changes in climate and atmospheric CO<sub>2</sub>. *Forstwiss. Centralblatt*, 121, Supplement 1: 155-171.
- Lasch, P., Kollas, C., Rock, J. and Suckow, F., 2010. Potentials and impacts of short-rotation coppice plantation with aspen in Eastern Germany under conditions of climate change. *Reg Environ Change*, 102: 83-94.
- Lasch, P., Schröder, J., Suckow, F., Gutsch, M. and Degenhardt, A., 2009. Nutzung von Modellen zur Vorbereitung auf die Zukunft. In: M. Elmer et al. Editors, *Nachhaltige Bewirtschaftung von Eichen-Kiefern-Mischbeständen*. Oekom Verlag, München, pp. 119-135.
- Lasch, P., Suckow, F. and Badeck, F.-W., 2007. Analyses of forest ecosystems' response to climate change at level II monitoring sites. In: J. Eichhorn Editor, *Symposium: Forests in a Changing Environment - Results of 20 years ICP Forests Monitoring Göttingen*, 25.-28.10.2006. Schriften aus der Forstlichen Fakultät der Universität Göttingen und der Nordwestdeutschen Forstlichen Versuchsanstalt. J.D. Sauerländer's Verlag Frankfurt am Main, Göttingen, pp. 136-141.
- Meiwes, K.-J. et al., 2007. Kohlenstoffumsatz in Waldökosystemen und deren Böden. Parametrisierung, Kalibrierung und Validierung von Modellen. *AFZ / Der Wald* 20/2007: 1076-1078.
- Reyer, C. et al., 2014. Projections of regional changes in forest net primary productivity for different tree species in Europe driven by climate change and carbon dioxide. *Annals Of Forest Science*, 712: 211-225.
- Reyer, C., Lasch, P., Mohren, G.M.J. and Sterck, F.J., 2010. Inter-specific competition in mixed forests of Douglas-fir *Pseudotsuga menziesii* and common beech *Fagus sylvatica* under climate change - a model-based analysis. *Annals Of Forest Science*, 678.
- Reyer, C.P.O., Flechsig, M., Lasch-Born, P. and van Oijen, M., 2016. Integrating parameter uncertainty of a process-based model in assessments of climate change effects on forest productivity. *Clim. Change*, 137: 395-409.
- Schelhaas, M.-J. et al., 2015. Alternative forest management strategies to account for climate change-induced productivity and species suitability changes in Europe. *Reg Environ Change*, 158: 1581-1594.
- Seidl, R., Rammer, W., Lasch, P., Badeck, F.W. and M.J., L., 2008. Does conversion of even-aged, secondary coniferous forest affect carbon sequestration? A simulation study under changing environmental conditions. *Silva Fennica*, 423: 369-386.

- Stojanović, D. et al., 2014. Impact of climate change and different management regimes to various ecosystem services in European beech forests in Serbia. *CONTEMPORARY AGRICULTURE / SAVREMENA POLJOPRIVREDA*, 63:312-325.
- Suckow, F., Lasch-Born, P., Gerstengarbe, F.-W., Werner, P. and Reyer, C.P.O., 2016. Climate change impacts on a pine stand in Central Siberia. *Reg Environ Change*, 166: 1671-1683.
- van Oijen, M. et al., 2013. Bayesian calibration, comparison and averaging of six forest models, using data from Scots pine stands across Europe. *For. Ecol. Manage.*, 289: 255-268.
- Wechsung, F., Gerstengarbe, F.W., Lasch, P. and Lüttger, A. Editors, 2009. *Die Ertragsfähigkeit ostdeutscher Ackerflächen unter Klimawandel*. PIK-Report, 112. PIK, Potsdam, 93 pp.
- Yousefpour, R. et al., 2018. Realizing Mitigation Efficiency of European Commercial Forests by Climate Smart Forestry. *Scientific Reports*, 81: 345.
